# Supplementary material for: Association between Food/UGT2B7 Polymorphisms and Pharmacokinetics/Pharmacodynamics Properties of Indapamide in Healthy Humans
Source: MDPI journal article supplement (doi:10.3390/biomedicines11051501), 2023-05-22
Supplement: s1 [file s1]

### Dominant Model:

In the dominant model (**Table S1**), again, all genetic variants in both SNPs had no significant impact on  $T_{\max}$ ,  $C_{\max}$ , and AUC<sub>0-t</sub>. However, rs11740316 variant AG was independently correlated with a 2.4 h decrease in MRT<sub>inf</sub>. In addition, food independently decreased  $T_{\max}$  by 5.5 h and increased  $C_{\max}$  by 8.1 ng/ml. Furthermore, older age was associated with a modest increase in  $C_{\max}$ . Finally, higher BMI correlated with longer MRT<sub>inf</sub>. Both SNPs had no significant impact on indapamide elimination (**Table S2**).

**Table S1.** Multiple regression models predicting the impact of rs7438135, rs11740316, and food on indapamide pharmacokinetic parameters (dominant genetic model).

|                           | $T_{\max}$          | $C_{\max}$           | AUC <sub>0-t</sub>   | MRT <sub>inf</sub>  |
|---------------------------|---------------------|----------------------|----------------------|---------------------|
|                           | Estimates           | Estimates            | Estimates            | Estimates           |
| (Intercept)               | 14.5 *** (9.8–19.3) | 29.8 *** (13.5–46.2) | 422.0 (–49.3–893.4)  | 16.7 *** (7.9–25.6) |
| Age (years):              | 0.0 (–0.1–0.1)      | 0.3 * (0.0–0.5)      | 8.2 * (1.5–14.8)     | 0.0 (–0.1–0.1)      |
| BMI (kg/m <sup>2</sup> ): | –0.1 (–0.3–0.2)     | –0.6 (–1.3–0.2)      | –1.5 (–22.9–19.8)    | 0.4 * (0.0–0.8)     |
| Food effect:              |                     |                      |                      |                     |
| Fasting                   | Reference           | Reference            | Reference            | Reference           |
| Fed                       | –5.5 *** (–6.6–4.4) | 8.1 *** (4.3–12.0)   | 81.2 (–28.5–191.0)   | –1.0 (–3.1–1.1)     |
| rs7438135:                |                     |                      |                      |                     |
| GG                        | Reference           | Reference            | Reference            | Reference           |
| AG + AA                   | 0.0 (–1.2–1.2)      | –0.2 (–4.4–4.0)      | –19.8 (–140.7–101.1) | –1.0 (–3.2–1.3)     |
| rs11740316:               |                     |                      |                      |                     |
| GG                        | Reference           | Reference            | Reference            | Reference           |
| AG + AA                   | 0.5 (–0.6–1.7)      | 1.3 (–2.6–5.2)       | –4.3 (–116.6–108.0)  | –2.4 * (–4.5–0.3)   |

\*  $p < 0.05$ , \*\*\*  $p < 0.001$ .

**Table S2.** Multiple regression models predicting the impact of rs7438135 and rs11740316 on indapamide elimination (dominant genetic model).

|                           | $T_{0.5}$                       | $K_e$                         |
|---------------------------|---------------------------------|-------------------------------|
| Predictors                | Estimates                       | Estimates                     |
| (Intercept)               | 14.35547 *** (6.76807–21.94286) | 0.04743 *** (0.02709–0.06778) |
| Age (years):              | 0.03155 (–0.07010–0.13321)      | –0.00012 (–0.00039–0.00016)   |
| BMI (kg/m <sup>2</sup> ): | 0.04609 (–0.29786–0.39003)      | 0.00001 (–0.00091–0.00093)    |
| rs7438135:                |                                 |                               |
| GG (wild-type)            | Reference                       | Reference                     |
| AG (Heterozygous)         | –1.16456 (–3.17243–0.84332)     | 0.00179 (–0.00359–0.00718)    |
| AA (Homozygous)           | –1.58218 (–4.43174–1.26738)     | 0.00275 (–0.00489–0.01039)    |
| rs11740316:               |                                 |                               |
| GG (wild-type)            | Reference                       | Reference                     |
| AG (Heterozygous)         | –0.94623 (–2.81987–0.92740)     | 0.00339 (–0.00164–0.00841)    |
| AA (Homozygous)           | 0.79946 (–2.63325–4.23218)      | –0.00255 (–0.01175–0.00665)   |

\*\*\*  $p < 0.001$ .

### Recessive Model:

In the recessive model (**Table S3**), again, all genetic variants in both SNPs had no significant impact on  $T_{\max}$ ,  $C_{\max}$ , and AUC<sub>0-t</sub>. In addition, food independently decreased  $T_{\max}$  by 5.5 h and increased  $C_{\max}$  by 8.6 ng/mL. Furthermore, older age was associated with a modest increase in  $C_{\max}$  and AUC<sub>0-t</sub>. Both SNPs and other covariates had no significant impact on indapamide elimination kinetics (**Table S4**).

**Table S3.** Multiple regression models predicting the impact of rs7438135, rs11740316, and food on indapamide pharmacokinetic parameters (recessive genetic model).

|                           | <b>T<sub>max</sub></b> | <b>C<sub>max</sub></b> | <b>AUC<sub>0-t</sub></b> | <b>MRT<sub>inf</sub></b> |
|---------------------------|------------------------|------------------------|--------------------------|--------------------------|
| Predictors                | Estimates              | Estimates              | Estimates                | Estimates                |
| (Intercept)               | 14.6 *** (9.8–19.3)    | 31.2 *** (15.3–47.2)   | 403.4 (–64.6–871.3)      | 16.3 ** (7.0–25.7)       |
| Age (years):              | 0.0 (–0.1–0.1)         | 0.3 * (0.0–0.5)        | 8.0 * (1.4–14.6)         | –0.0 (–0.1–0.1)          |
| BMI (kg/m <sup>2</sup> ): | –0.0 (–0.3–0.2)        | –0.6 (–1.3–0.1)        | –1.3 (–22.5–20.0)        | 0.4 (–0.1–0.8)           |
| Food effect:              |                        |                        |                          |                          |
| <b>Fasting</b>            | Reference              | Reference              | Reference                | Reference                |
| <b>Fed</b>                | –5.5 *** (–6.7–4.4)    | 8.6 *** (4.9–12.4)     | 83.9 (–27.6–195.4)       | –1.0 (–3.3–1.2)          |
| rs7438135:                |                        |                        |                          |                          |
| <b>GG + AG</b>            | Reference              | Reference              | Reference                | Reference                |
| <b>AA</b>                 | –0.3 (–1.9–1.3)        | 2.9 (–2.4–8.2)         | 6.9 (–149.2–163.0)       | –0.8 (–3.9–2.3)          |
| rs11740316:               |                        |                        |                          |                          |
| <b>GG + AG</b>            | Reference              | Reference              | Reference                | Reference                |
| <b>AA</b>                 | 0.7 (–1.3–2.7)         | 3.8 (–2.9–10.5)        | –21.2 (–218.4–176.0)     | 0.0 (–3.9–4.0)           |

\*  $p < 0.05$ , \*\*  $p < 0.01$ , \*\*\*  $p < 0.001$ .

**Table S4.** Multiple regression models predicting the impact of rs7438135 and rs11740316 on indapamide elimination (recessive genetic model).

|                           | <b>T<sub>0.5</sub></b>          | <b>Ke</b>                     |
|---------------------------|---------------------------------|-------------------------------|
| Predictors                | Estimates                       | Estimates                     |
| (Intercept)               | 14.35547 *** (6.76807–21.94286) | 0.04743 *** (0.02709–0.06778) |
| Age (years):              | 0.03155 (–0.07010–0.13321)      | –0.00012 (–0.00039–0.00016)   |
| BMI (kg/m <sup>2</sup> ): | 0.04609 (–0.29786–0.39003)      | 0.00001 (–0.00091–0.00093)    |
| rs7438135:                |                                 |                               |
| GG (wild-type)            | Reference                       | Reference                     |
| AG (Heterozygous)         | –1.16456 (–3.17243–0.84332)     | 0.00179 (–0.00359–0.00718)    |
| AA (Homozygous)           | –1.58218 (–4.43174–1.26738)     | 0.00275 (–0.00489–0.01039)    |
| rs11740316:               |                                 |                               |
| GG (wild-type)            | Reference                       | Reference                     |
| AG (Heterozygous)         | –0.94623 (–2.81987–0.92740)     | 0.00339 (–0.00164–0.00841)    |
| AA (Homozygous)           | 0.79946 (–2.63325–4.23218)      | –0.00255 (–0.01175–0.00665)   |

\*\*\*  $p < 0.001$ .

**Table S5.** Impact of food, rs7438135, rs11740316 on indapamide pharmacodynamics (Dominant model).

|                | <b>SBP</b>            | <b>DBP</b>           | <b>Pulse</b>         |
|----------------|-----------------------|----------------------|----------------------|
| Predictors     | Estimates             | Estimates            | Estimates            |
| (Intercept)    | 84.5 *** (62.9–106.1) | 46.9 *** (30.0–63.8) | 58.9 *** (44.6–73.2) |
| Baseline:      | 0.2 * (0.0–0.4)       | 0.3 ** (0.1–0.5)     | 0.2 * (0.0–0.4)      |
| Food:          |                       |                      |                      |
| <b>Fasting</b> | Reference             | Reference            | Reference            |
| <b>Fed</b>     | –0.0 (–1.9–1.8)       | 0.3 (–1.3–2.0)       | 0.2 (–0.8–1.3)       |
| rs7438135:     |                       |                      |                      |
| <b>GG</b>      | Reference             | Reference            | Reference            |
| <b>AG + AA</b> | 1.0 (–1.0–2.9)        | 0.1 (–1.5–1.7)       | –0.6 (–1.8–0.5)      |
| rs11740316:    |                       |                      |                      |
| <b>GG</b>      | Reference             | Reference            | Reference            |
| <b>AG + AA</b> | 0.7 (–1.1–2.6)        | 1.0 (–0.5–2.6)       | 0.1 (–1.0–1.2)       |

\*  $p < 0.05$ , \*\*  $p < 0.01$ , \*\*\*  $p < 0.001$ . SBP: Systolic blood pressure, DBP: Diastolic blood pressure.

**Table S6.** Impact of food, rs7438135, rs11740316 on indapamide pharmacodynamics (Recessive model).

|                | <b>SBP</b>            | <b>DBP</b>           | <b>Pulse</b>         |
|----------------|-----------------------|----------------------|----------------------|
| Predictors     | Estimates             | Estimates            | Estimates            |
| (Intercept)    | 82.3 *** (61.2–103.4) | 46.2 *** (30.1–62.3) | 59.8 *** (45.3–74.3) |
| Baseline:      | 0.2 ** (0.1–0.4)      | 0.3 ** (0.1–0.5)     | 0.2 * (0.0–0.4)      |
| Food:          |                       |                      |                      |
| <b>Fasting</b> | Reference             | Reference            | Reference            |
| <b>Fed</b>     | 0.1 (–1.7–2.0)        | 0.4 (–1.3–2.1)       | 0.3 (–0.8–1.3)       |
| rs7438135:     |                       |                      |                      |
| <b>GG + AG</b> | Reference             | Reference            | Reference            |
| <b>AA</b>      | 0.8 (–1.7–3.3)        | 0.0 (–2.1–2.1)       | –0.1 (–1.6–1.5)      |
| rs11740316:    |                       |                      |                      |
| <b>GG + AG</b> | Reference             | Reference            | Reference            |
| <b>AA</b>      | 2.2 (–1.0–5.3)        | 2.0 (–0.6–4.6)       | 0.6 (–1.4–2.5)       |

\*  $p < 0.05$ , \*\*  $p < 0.01$ , \*\*\*  $p < 0.001$ . SBP: Systolic blood pressure, DBP: Diastolic blood pressure.
